# Supplementary material
Source: Springer Nature journal article supplement (https://www.springermedizin.de/resource/supplementary/12885_2014_4747_MOESM2_ESM.pdf/9467184)

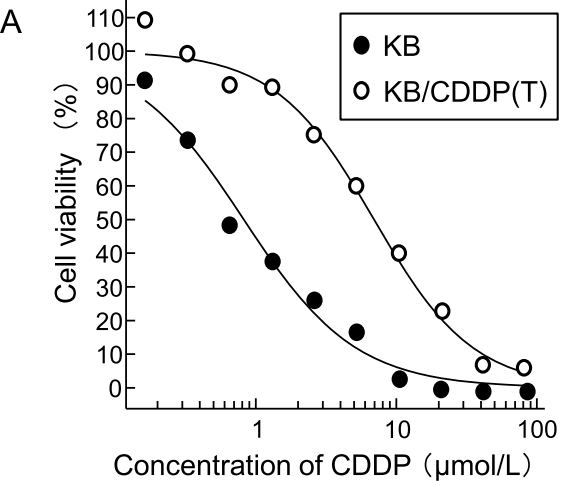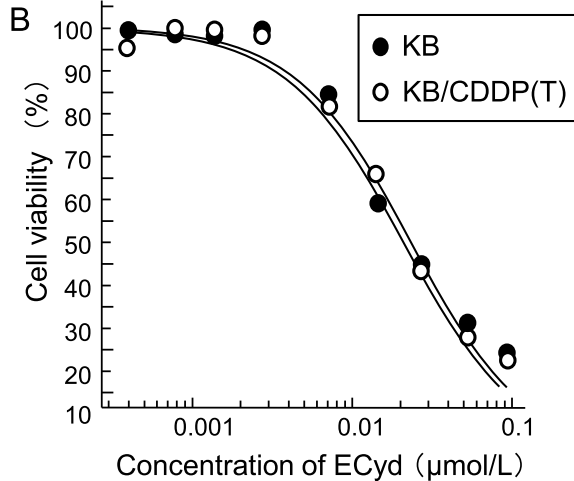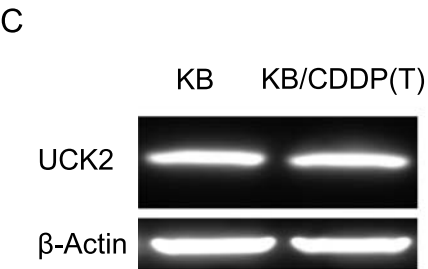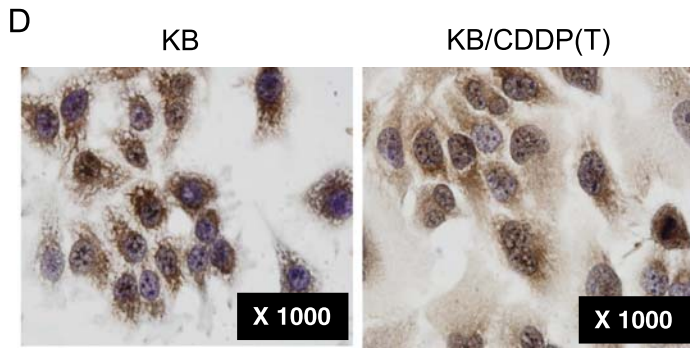

Supplement: MOESM2 [file 9467184]
